# Supplementary material for: Isothermal digital detection of microRNAs using background-free molecular circuit
Source: PubMed Central journal article supplement — Sci Adv. 2020 Jan 22;6(4):eaay5952. doi: 10.1126/sciadv.aay5952 (PMC6976291; doi:10.1126/sciadv.aay5952), 2020-01-22
Supplement: aay5952_SM.pdf [file aay5952_SM.pdf]

## Supplementary Materials for

### Isothermal digital detection of microRNAs using background-free molecular circuit

Guillaume Gines, Roberta Menezes, Kaori Nara, Anne-Sophie Kirstetter, Valerie Taly\*, Yannick Rondelez\*

\*Corresponding author. Email: [yannick.rondelez@espci.fr](mailto:yannick.rondelez@espci.fr) (Y.R.); [valerie.taly@parisdescartes.fr](mailto:valerie.taly@parisdescartes.fr) (V.T.)

Published 22 January 2020, *Sci. Adv.* **6**, eaay5952 (2020)

DOI: 10.1126/sciadv.aay5952

#### This PDF file includes:

- Fig. S1. Basic EXPAR system with hot start.
- Fig. S2. Detailed chemical reaction network of the molecular program for the detection of microRNAs.
- Fig. S3. Bistable amplification switch.
- Fig. S4. Experimental condition optimizations.
- Fig. S5. Extended data from Fig. 2A.
- Fig. S6. Droplet analysis.
- Fig. S7. Extended data from Fig. 3D.
- Fig. S8. Specificity of the trigger production.
- Fig. S9. RT-qPCR calibration.
- Fig. S10. Detection of cel-miR-39 in plasma sample.
- Fig. S11. Microfluidic chip design.
- Table S1. Oligonucleotide sequences used throughout the study.

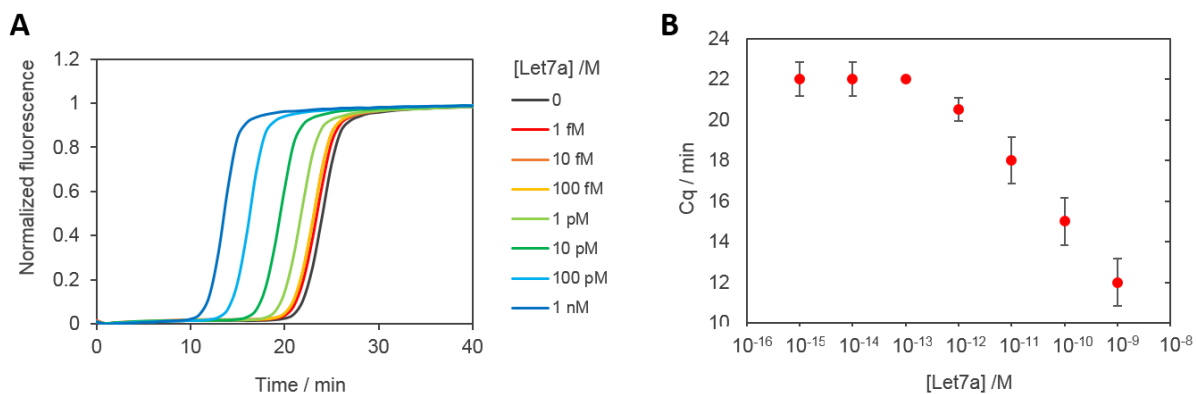

**Fig. S1. Basic EXPAR system with hot start.** We reproduced the experiment from Zhang et al. using the exponential amplification reaction (EXPAR) based on a dual-repeat template, which enables the replication of the Let-7a sequence using extension (Vent(exo-) DNA polymerase and nicking (Nt.BstNBI nicking enzyme) cycles. Briefly, the reaction mixture was prepared separating the DNA template and dNTP from the enzymes, which has been shown by the authors to delay the self-amplification reaction (in absence of target). Part A. consisted in 1X NEBuffer 3.1, 200 nM EXPAR template (Supplementary Table 1), 500  $\mu$ M dNTP (NEB), 1.6 u/ $\mu$ L RNase inhibitor murine (NEB) and the synthetic Let-7a RNA target at various concentrations. The part B contained 2X ThermoPol buffer (NEB), 800 u/mL Nt.BstNBI, 100 u/mL Vent(exo-) DNA polymerase and 2X EvaGreen (Biotium). Samples are prepared by pre-incubating separately the two mixtures at 55°C for 10 min before combining then (5  $\mu$ L each), following by a quick vortex mixing. The EXPAR reaction is monitored in real-time at 55°C. **(A)** Amplification curves obtained for various concentrations of Let-7a. **(B)** The Cq (corresponding to the time where the curves reach 10 % of the maximum fluorescence intensity) are plotted as a function of the initial target concentration (the error bars correspond to the standard deviation from three independent experiments, each in duplicate).

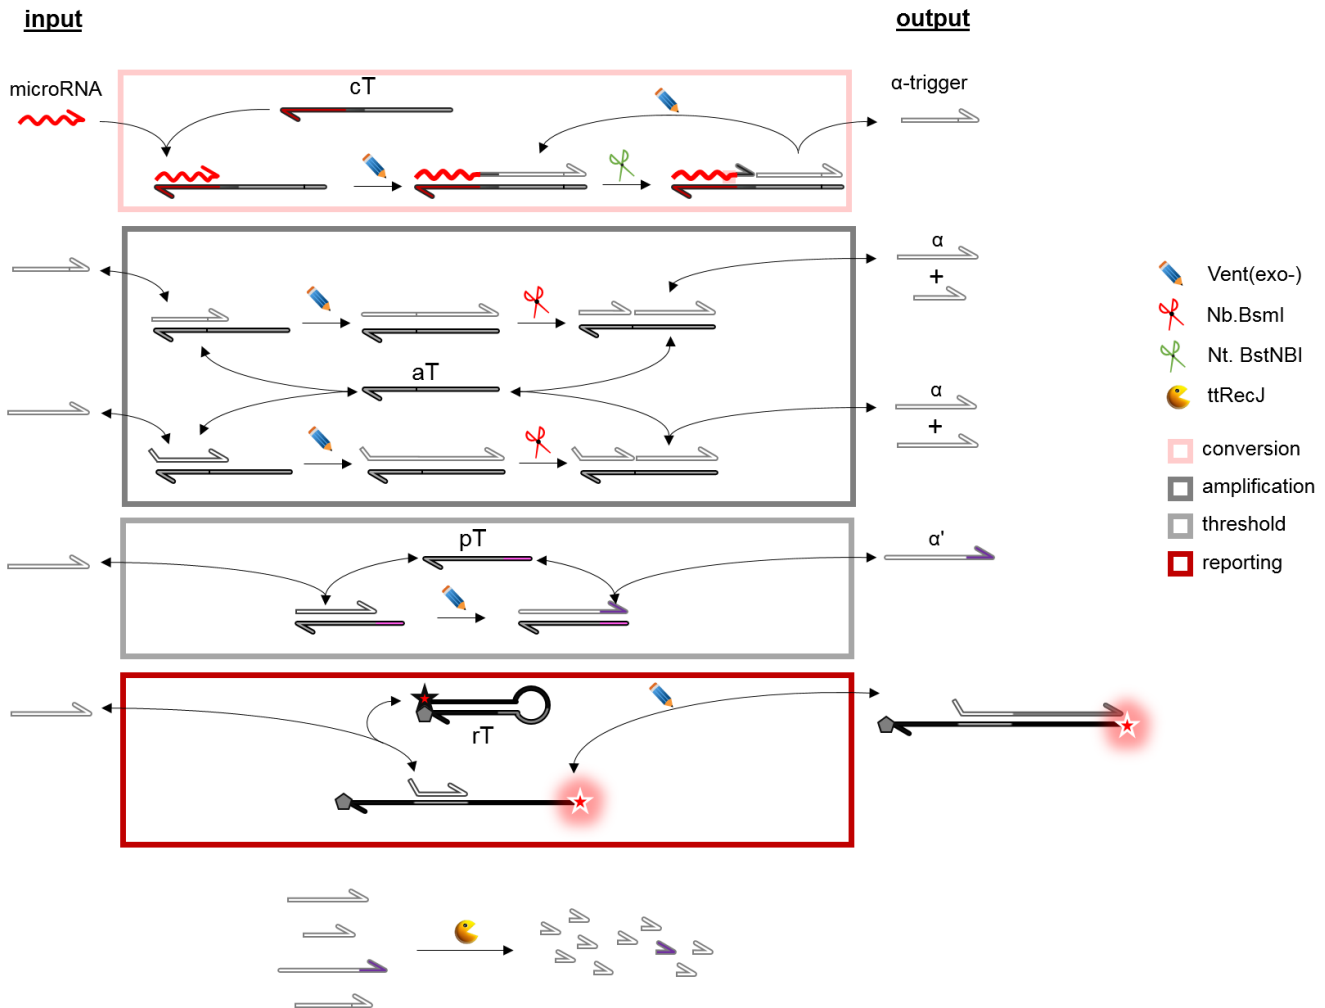

**Fig. S2. Detailed chemical reaction network of the molecular program for the detection of microRNAs.** The molecular program is composed of a set of 4 templates encoding production and degradation of short DNA strands, these reactions being catalyzed by mixture of enzymes. The conversion template (cT) specific of a microRNA sequence, hybridizes to the corresponding target on its input part (3'). The RNA sequence is used as a primer and is extended by the polymerase along the cT. Upon nicking by the enzyme Nt.BstNBI, an  $\alpha$ -trigger is released. The catalytic elongation/nicking cycles induce the linear production this trigger. Upon binding of the trigger to the 3' part of the autocatalytic template (aT), the elongation by the polymerase and nicking of the duplex by the enzyme Nb.BsmI produce a molecule of  $\alpha$ , which is therefore exponentially amplified. To avoid this autocatalytic reaction to self-start from spurious reactions, a pseudotemplate (pT) is introduced. The pT catalyzes the deactivation of  $\alpha$  strands by mediating the addition of a 3' polynucleotide tail preventing the elongation of the product  $\alpha'$  on the aT. This mechanism provides to the system an amplification threshold, meaning that the amplification reaction can start only if a certain concentration of  $\alpha$  strands is reached. Below this concentration, the pT acts as a sink that catalytically degrades  $\alpha$  strands. Above this threshold concentration, this sink effect is saturated, and the exponential amplification of  $\alpha$  starts. The reporting probe (rT) reacts stoichiometrically with  $\alpha$  strands to provide a fluorescent signal. All produced strands ( $\alpha$ -trigger,  $\alpha$ ,  $\alpha'$ ) are dynamically degraded by the exonuclease ttRecJ to keep the system out-of-equilibrium (notably to avoid the poisoning of the pT by the accumulation of  $\alpha'$ ).

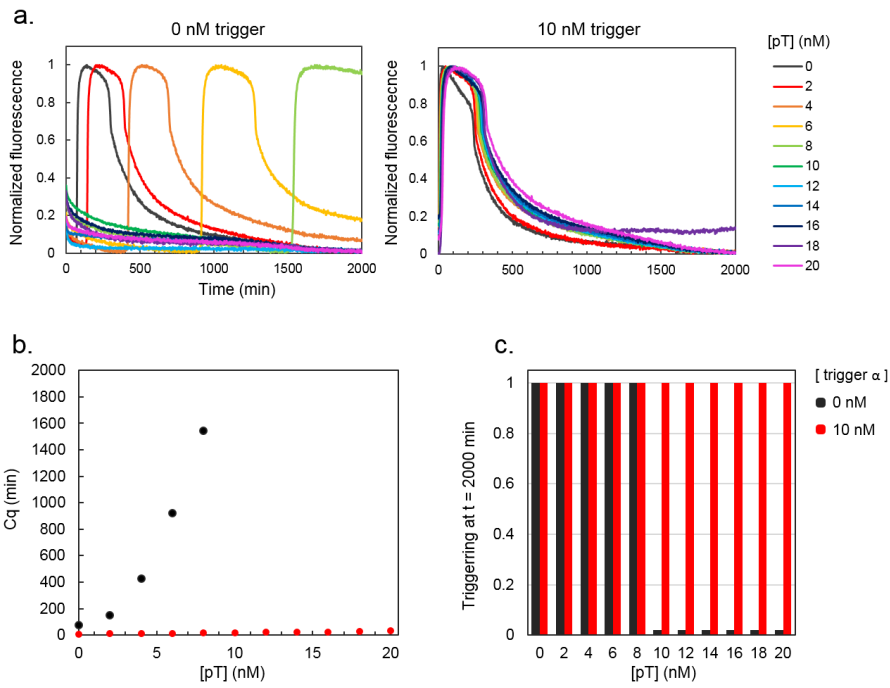

**Fig. S3. Bistable amplification switch.** The autocatalytic template  $aT\alpha$  mixed with an increasing concentration of  $pT\alpha$  is spiked with 0 or 10 nM of trigger  $\alpha$  and the amplification is monitored in real-time using the double strand specific binding dye EvaGreen. a. Amplification curves over 2000 minutes. b. The  $C_q$  (amplification time, corresponding to the time to reach 20 % of the maximum fluorescence) is plotted as a function of the pseudotemplate concentration. c. Final state of the bistable switch as a function of the initial pT concentration (0 = no amplification, 1 = amplification).

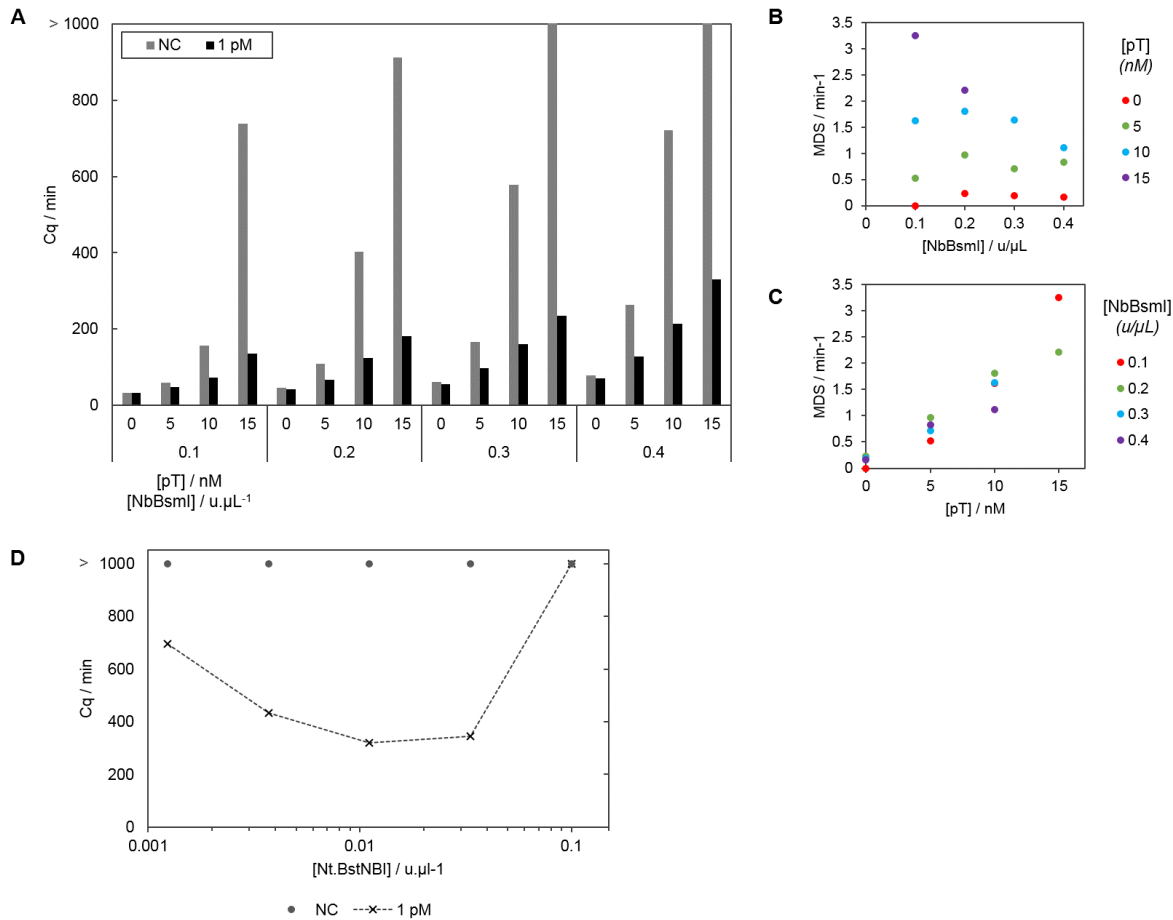

**Fig. S4. Experimental condition optimizations.** (A) Effect of the pseudotemplate and Nb.BsmI concentrations on the detection of Let-7a. Samples containing a defined concentration of pT (from 0 to 15 nM) and Nb.BsmI (from 0.1 to 0.4 u/L) are spiked with 0 or 1 pM Let-7a and the amplification reaction was monitored in real-time. The Cq are plotted as a function of the pT and Nb.BsmI concentrations. (B) A microRNA detection score (MDS) is calculated for each set of concentration according to the following equation.  $MDS = 100 \left( \frac{C_{qNC}}{C_{q1pM}} - 1 \right) / C_{q1pM}$ . The MDS is meant to reflect both the time window between the amplification times of the NC and 1 pM and the speed of the target-triggered reaction. The MDS is plotted as a function of b) the pseudotemplate concentration and c) the Nb.BsmI concentration. It is shown that both parameters delay the amplification reaction: the pseudotemplate plays the role of an active sink that degrades part of the produced triggers. Nb.BsmI is known to be inhibited by its own product (the nicked duplex), which probably slows down the reaction by preventing the release of the trigger after cutting the duplex. It is to note that increasing the pseudotemplate concentration positively affect the detection score, by delaying preferentially the NC amplification and affected to a lesser extent the target-triggered amplification. On the other hand, Nb.BsmI affect the amplification time, irrespective from the target concentration and thus negatively affect the detection score. This observation demonstrates the importance of the active degradation mechanism provided by the pseudotemplate to reduce/abolish background amplification. (C) Optimization of the Nt.BstNBI concentration. Samples spiked with 0 or 1 pM of Let-7a are incubated in presence of a varying concentration of Nt.BstNBI. The Cq are plotted as a function of the Nt.BstNBI concentration. The graph suggests an optimal concentration around 0.01 u/L.

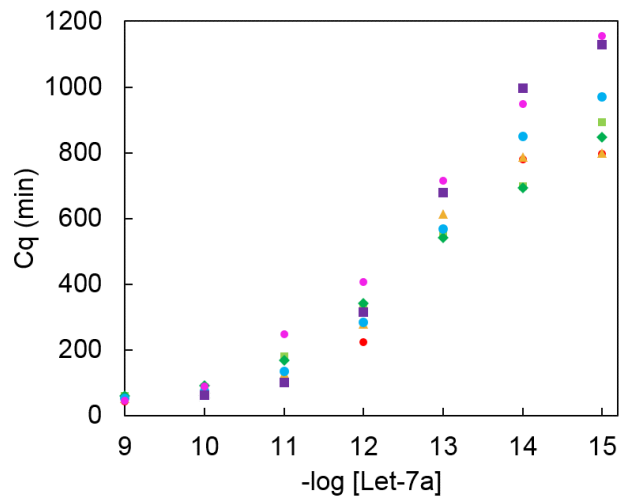

**Fig. S5. Extended data from Fig. 2A.** In-solution detection of Let-7a using the 4-template molecular program. The amplification start times (Cq) are plotted for 6 independent concentration ranges.

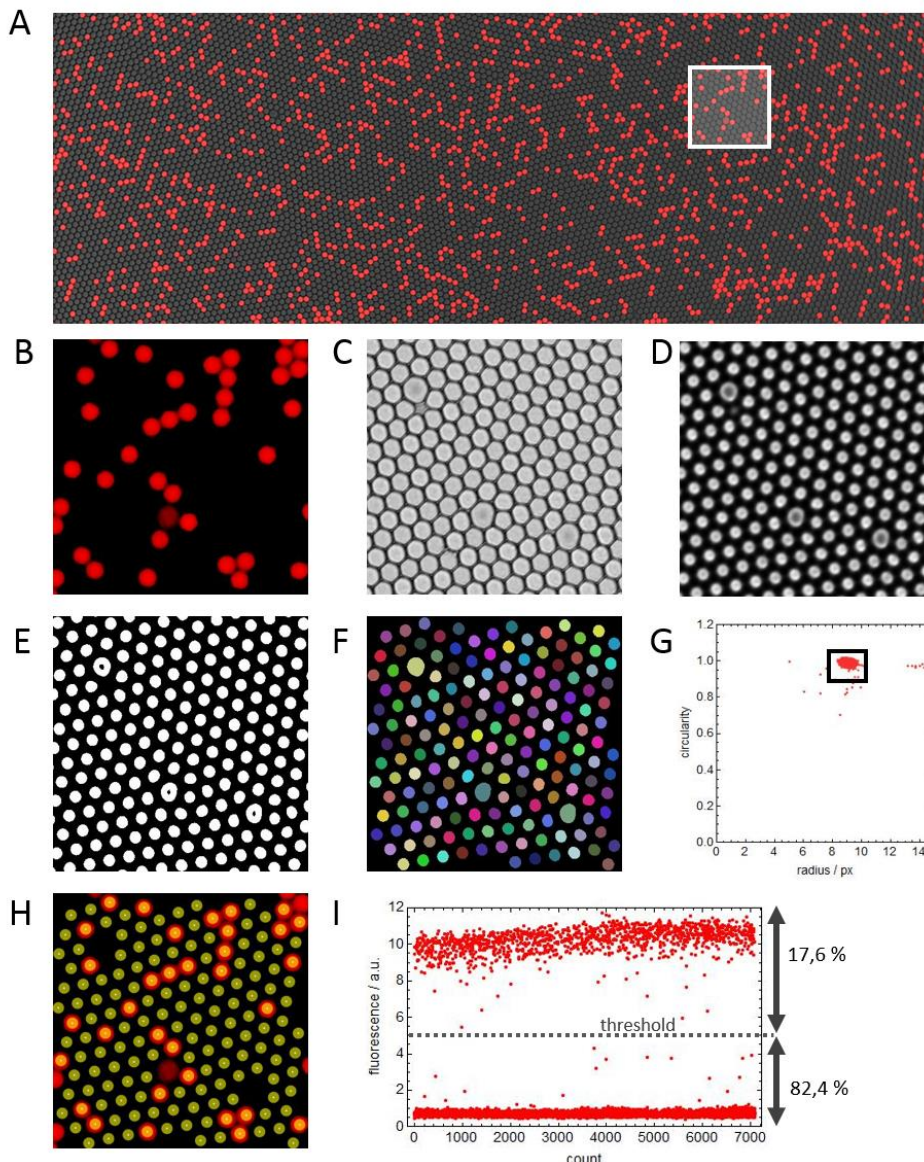

**Fig. S6. Droplet analysis.** (A) After incubation, the emulsion is sandwiched between two hydrophobic glass slides to obtain a monolayer of droplets and imaged with an epifluorescence microscope. (B) Atto633

fluorescence channel. (C) brightfield channel, (D) brightfield channel defocused by a 10  $\mu\text{m}$  offset. With this setting, the droplet outlines are reinforced, facilitating the droplets segmentation. (E) The brightfield image (D) is binarized and (F) all droplets are segmented. (G) The droplets are filtered according to their size and circularity. (H) The fluorescence of each droplet is extracted from a disk of radius  $r$  (with  $3 < r < 6$  pixels) and center  $xy$  ( $xy$  corresponding to the centroid of the selected component). (I) The positive droplets corresponds to the ones with a fluorescence exceeding a set threshold (corresponding to  $\frac{\overline{\text{pos}} - \overline{\text{neg}}}{2}$ , where  $\overline{\text{pos}}$  and  $\overline{\text{neg}}$  correspond to the median fluorescence of the positive and negative droplet population respectively). Knowing the droplet volume, the concentration is calculated back from the Poisson law using the equation  $[\text{miR}] = \frac{\lambda}{N_A \cdot V}$ , where  $\lambda$  represents the average number of microRNA targets per droplet,  $N_A$  is the Avogadro number and  $V$  is the volume of the droplets (in L).  $\lambda = -\ln(1 - F_{\text{pos}})$ , where  $F_{\text{pos}}$  is the frequency of positive droplets. The 95% confidence interval is given by the uncertainty on a binomial proportion  $\lambda_c = \lambda \pm 1.96 \sqrt{\frac{F_{\text{pos}} \cdot F_{\text{neg}}}{n_{\text{drop}}}}$ , where  $F_{\text{pos}}$  and  $F_{\text{neg}}$  correspond to the frequency of positive and negative droplets respectively and  $n_{\text{drop}}$  is the total number of droplets analyzed.

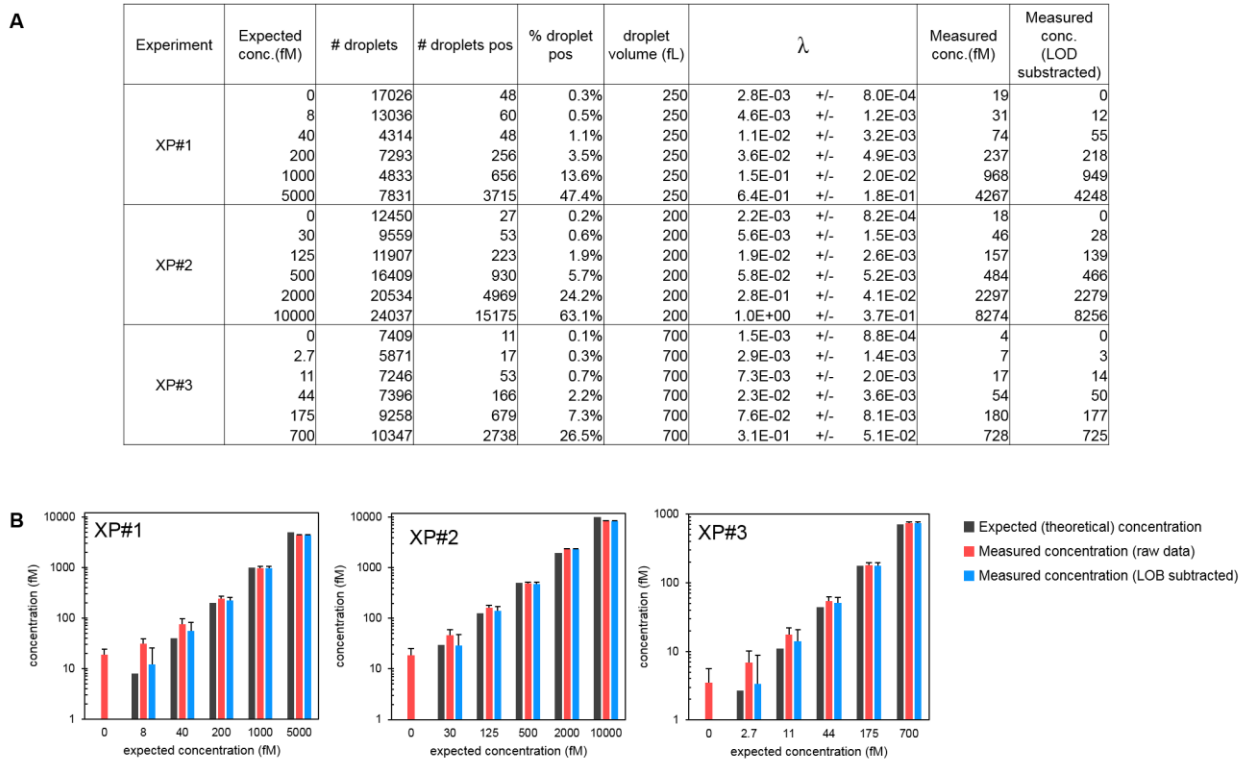

**Fig. S7. Extended data from Fig. 3D.** (A) Raw data obtained from the images analysis for the three independent experiments (XP#1-3). (B) the concentration measured is plotted as a function of the expected spiked-in concentration. The limit of blank (LOB) corresponds to the measured concentration in the negative control. The data are corrected by subtracting the LOB from the measured concentration obtained from the Poisson statistics (cf. Supplementary Fig. 6).

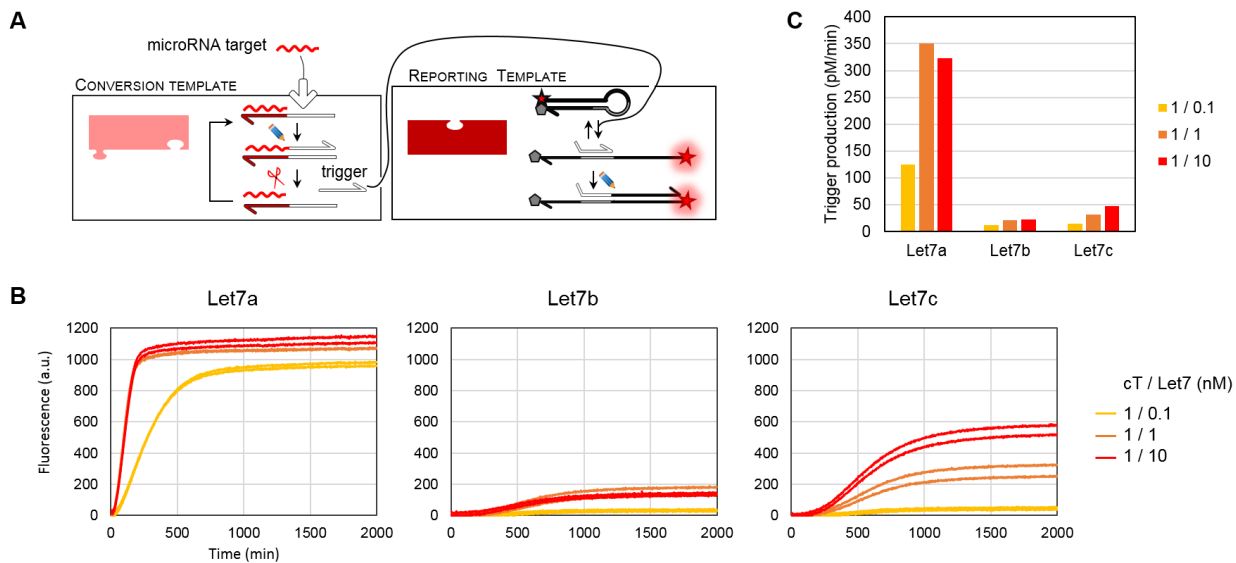

**Fig. S8. Specificity of the trigger production.** (A) The cT Let7ato $\alpha$  (1 nM) is incubated with the target Let7a or analog target Let7b or Let7c (0.1, 1, 10 nM) together with the rT $\alpha$  (50 nM), the polymerase Vent(exo-) and the nicking enzyme NtBstNBI. (B) The production of  $\alpha$  by the duplexes cT/Let7 is directly visualized by real-time fluorescence monitoring at 50°C. (C) The production rate for each condition is estimated as the maximum fluorescence increase of the rT $\alpha$ .

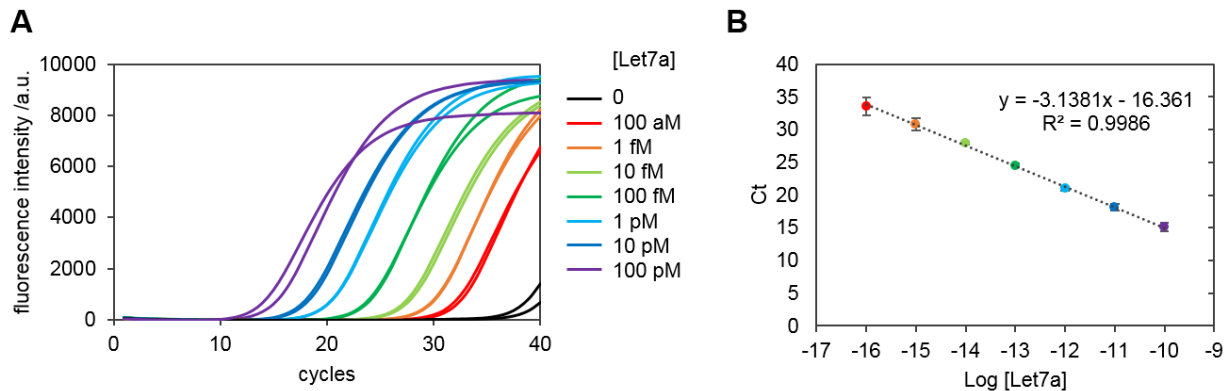

**Fig. S9. RT-qPCR calibration.** (A) Amplification curves using standard concentrations of a synthetic Let-7a target obtained for a replicate experiment. (B) Ct (cycling threshold) are plotted as a function of the Let-7a concentration.



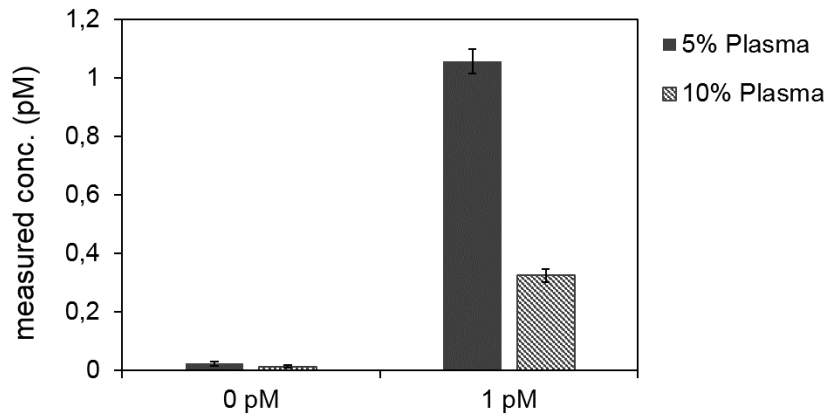

**Fig. S10. Detection of cel-miR-39 in plasma sample.** Human blood samples were collected from healthy donors (HIV, HBV, and HCV negative) into 10 mL blood collection tubes (Streck tubes supplied by Biopredic International). Plasma was obtained by centrifugation for 10 min. at 2000 x g at 4°C followed by centrifugation for 15 min. at 2000 x g at 4°C. Plasma was aliquoted in clean polypropylene tubes using a Pasteur pipette, and stored at -80°C until use. 0 or 1 pM of cel-miR39 is spiked in an amplification mixture supplemented with 5 or 10 % plasma (v/v) and RNase inhibitor, murine at 1 u/μL. The measured concentrations reported on the plot indicate the full recovery of the exogenous microRNA in 5% plasma, while only 32 % are detected when increasing the plasma concentration to 10 %. This suggests that, despite the addition of RNase inhibitor, the spiked-in microRNA is significantly degraded.

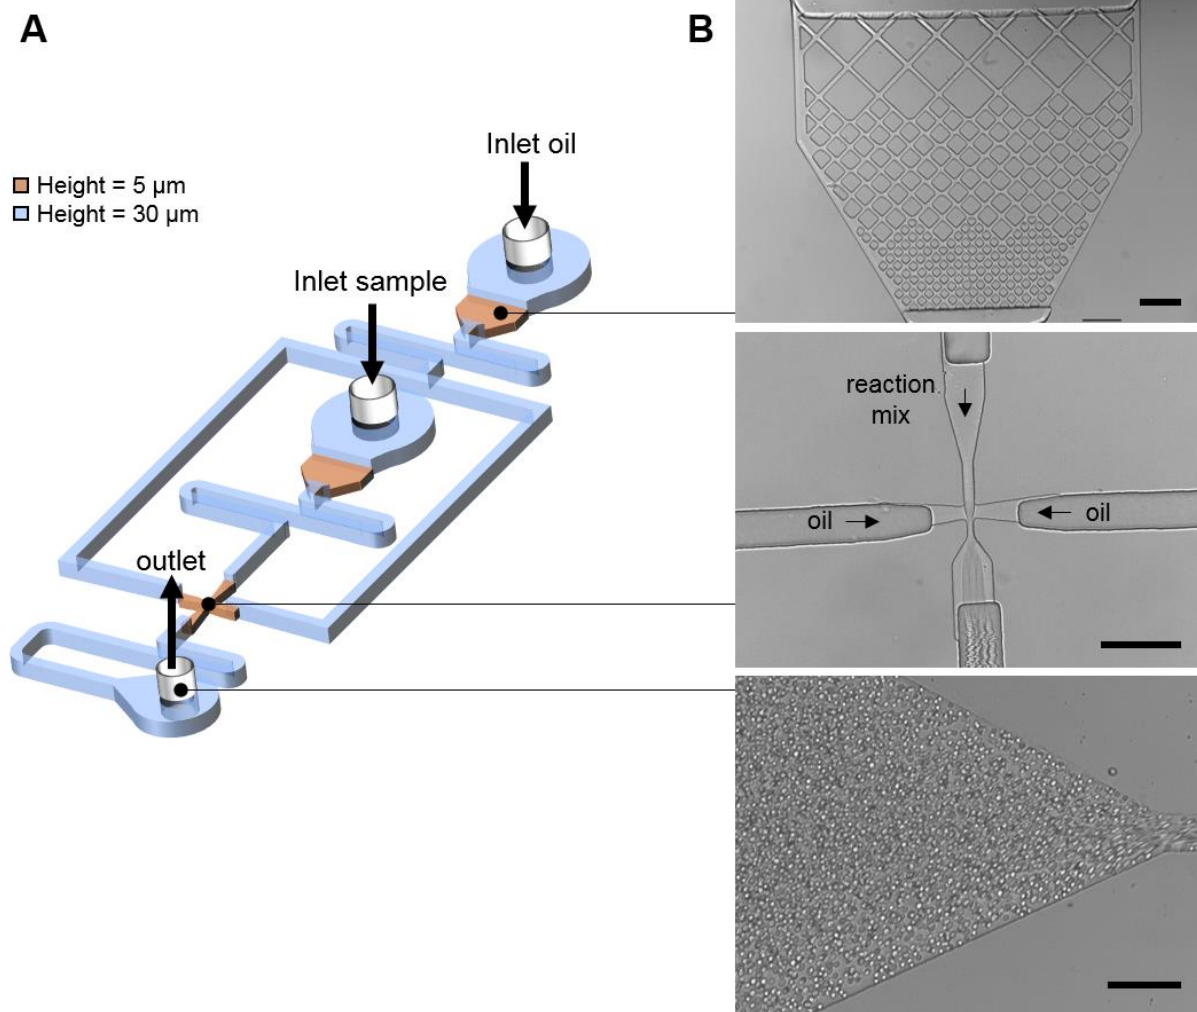

**Fig. S11. Microfluidic chip design.** (A) Layout of the microfluidic circuit. (B) Microscopy images of (from top to down) the filter, the flow focusing junction and the outlet. Scale bars represents 100  $\mu\text{m}$

**Table S1. Oligonucleotide sequences used throughout the study.** "\*" denotes phosphorothioate backbone modification. "p" denotes 3'-phosphate modification. Upper and lower cases represent 2'-deoxyribonucleotide and ribonucleotide, respectively.

| ID          | Sequence                                                       | Function          |
|-------------|----------------------------------------------------------------|-------------------|
| α           | CATTCTGGACTG                                                   | s-strand          |
| aTα         | C*A*G*T*CCAGAATGCAGTCCAGAA p                                   | aT                |
| pTα         | T*T*T*T*TCAGTCCAGAATG p                                        | pT                |
| rTα         | Atto633 *A*T*TCTGAATGCAGTCCAGAAT BHQ2                          | rT                |
| Let7atoα    | TGCAGTCCAGAAGTTTGACTCAAACCTATAACAACCTACTACCTCA p               | cT                |
| Let7ctoα    | TGCAGTCCAGAAGTTTGACTCAAACCATAACAACCTACTACCTCA p                | cT                |
| mir39toα    | TGCAGTCCAGAAGTTTGACTCACAAGCTGATTTACACCC p                      | cT                |
| mir92atoα   | TGCAGTCCAGAAGTTTGACTCAAGCATTGCAACCGATCCCAACC p                 | cT                |
| mir31*toα   | TGCAGTCCAGAAGTTTGACTCAGATGGCAATATGTTGGCA p                     | cT                |
| mir31toα    | TGCAGTCCAGAAGTTTGACTCAACAGCTATGCCAGCATCT p                     | cT                |
| mir215toα   | TGCAGTCCAGAAGTTTGACTCAGTCTGTCAATTCATAGGTCAT p                  | cT                |
| Let-7a      | ugagguaguagguuguauaguu                                         | microRNA          |
| Let-7b      | ugagguaguagguugugugguu                                         | microRNA          |
| Let-7c      | ugagguaguagguuguaugguu                                         | microRNA          |
| mir39-ce    | ucaccggguguaaaucagcuug                                         | microRNA          |
| mir92a      | agguugggaucgguugcaaugcu                                        | microRNA          |
| mir31*      | ugcuauGCCAACAUauGCCAUC                                         | microRNA          |
| mir31       | aggcaagaucuggcauagcugu                                         | microRNA          |
| mir215      | augaccuaugaauugacagac                                          | microRNA          |
| Expar-Let7a | AACTATAACAACCTACTACCTCAAACAGACTCAAACCTATAACAACC<br>TACTACCTCAA | EXPAR<br>template |
